# Supplementary material for: A Genome-Wide Analysis of Promoter-Mediated Phenotypic Noise in Escherichia coli
Source: PubMed Central journal article supplement (PMC3261926; doi:10.1371/journal.pgen.1002443), 2012-01-19
Supplement: pgen.1002443.s001.pdf [file pgen.1002443.s001.pdf]

Log10 side scatter

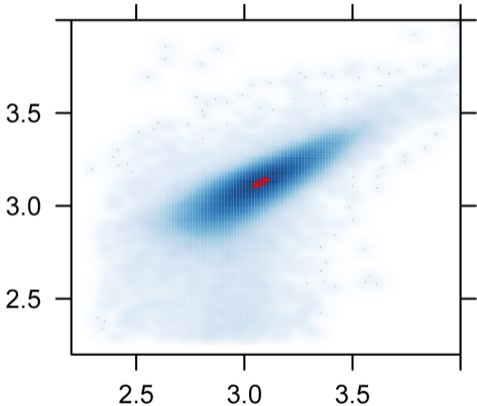

Log10 forward scatter
