# Supplementary material for: A Genome-Wide Analysis of Promoter-Mediated Phenotypic Noise in Escherichia coli
Source: PLOS journal article supplement (doi:10.1371/journal.pgen.1002443), 2012-01-19

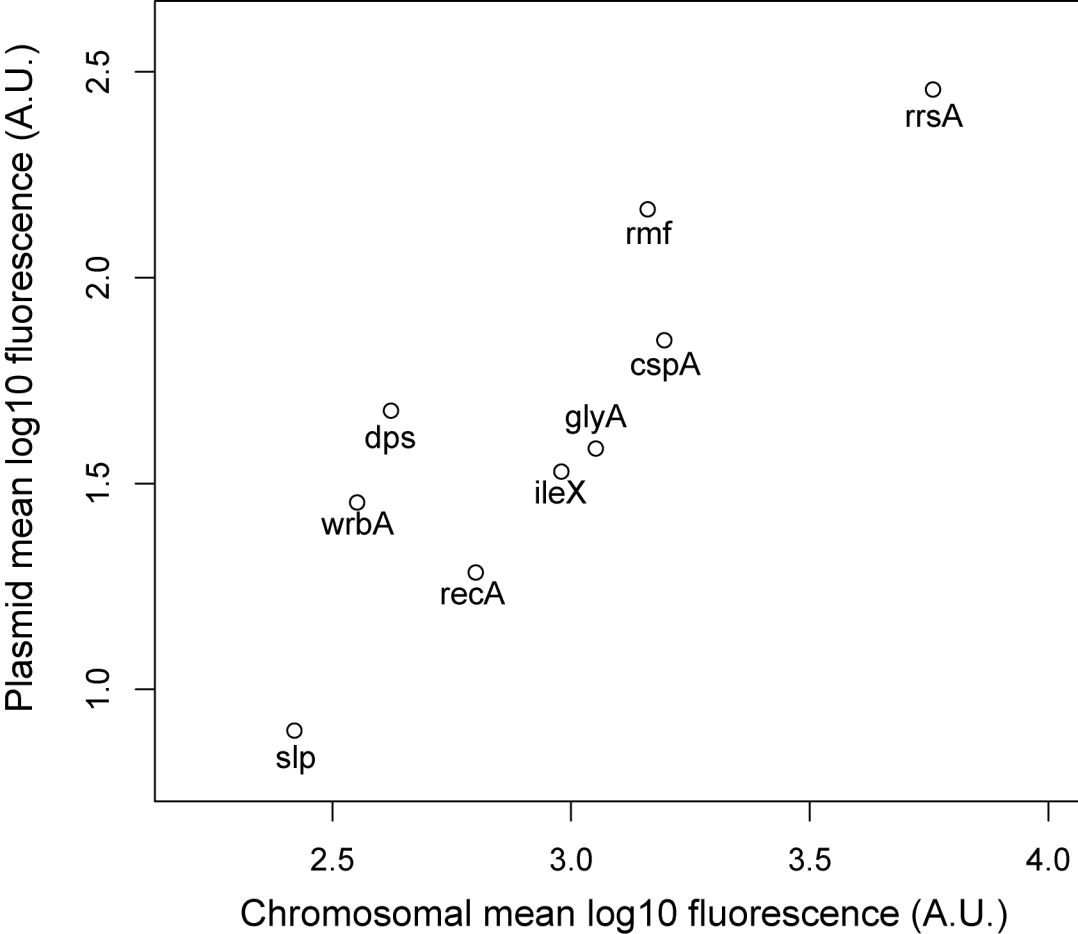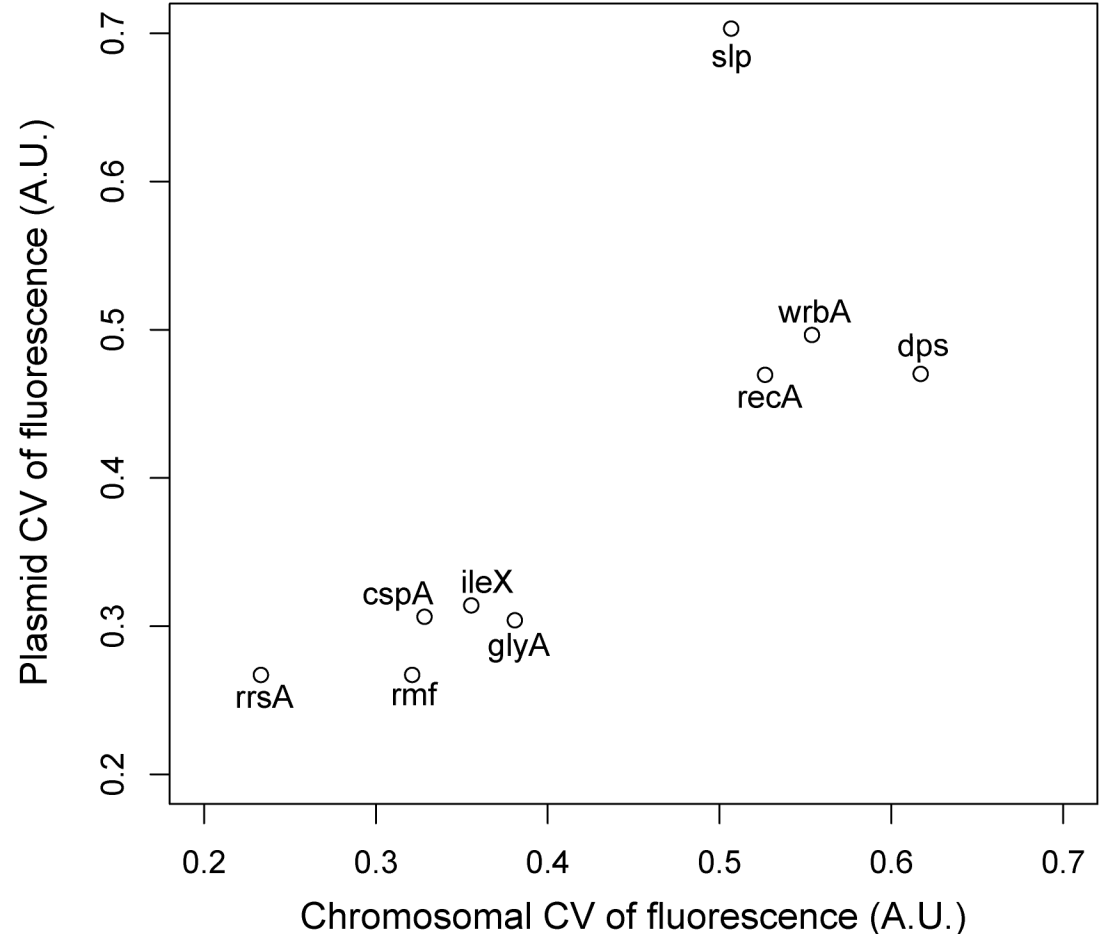

Supplement: S4 (10.1371/journal.pgen.1002443.s004) [file journal.pgen.1002443.s004.pdf]
